# Supplementary material for: A Novel Geospatial Simulation Framework for Projecting Climate Dynamics
Source: Research Square preprint supplement (doi:10.21203/rs.3.rs-7059108/v1), 2025-07-31
Supplement: Supplementary file 1 [file 4b69fa4ab9536973b260ed5e.docx]

**Table S1.** The percentage of the pixels covered by each calculated UNEP index-based climatic class from 1967 to 2024

| year | UNEP classes | | | | |
| --- | --- | --- | --- | --- | --- |
| 1 | 2 | 3 | 4 | 5 |
| 1967 | 17.057 | 47.278 | 30.038 | 2.956 | 2.671 |
| 1968 | 1.781 | 56.200 | 29.723 | 8.861 | 3.434 |
| 1969 | 7.500 | 50.310 | 21.521 | 8.798 | 11.871 |
| 1970 | 19.206 | 47.378 | 29.123 | 2.312 | 1.981 |
| 1971 | 18.613 | 47.854 | 30.816 | 1.832 | 0.885 |
| 1972 | 1.251 | 46.805 | 32.724 | 12.118 | 7.103 |
| 1973 | 31.736 | 36.207 | 27.431 | 2.654 | 1.973 |
| 1974 | 0.629 | 53.051 | 37.719 | 5.090 | 3.510 |
| 1975 | 2.122 | 58.986 | 31.777 | 3.303 | 3.812 |
| 1976 | 0.410 | 44.392 | 39.870 | 10.447 | 4.881 |
| 1977 | 3.776 | 54.942 | 24.718 | 11.391 | 5.173 |
| 1978 | 7.252 | 51.110 | 32.255 | 5.083 | 4.300 |
| 1979 | 3.393 | 53.166 | 37.797 | 3.581 | 2.064 |
| 1980 | 9.586 | 48.610 | 32.643 | 5.791 | 3.371 |
| 1981 | 3.054 | 52.576 | 37.002 | 4.034 | 3.334 |
| 1982 | 0.541 | 49.412 | 29.201 | 8.881 | 11.964 |
| 1983 | 3.386 | 59.805 | 31.162 | 3.239 | 2.407 |
| 1984 | 7.754 | 52.617 | 24.352 | 10.113 | 5.164 |
| 1985 | 22.796 | 43.900 | 27.196 | 3.176 | 2.932 |
| 1986 | 5.569 | 45.422 | 35.970 | 8.837 | 4.203 |
| 1987 | 17.225 | 43.244 | 28.082 | 7.386 | 4.064 |
| 1988 | 3.929 | 57.032 | 32.633 | 3.246 | 3.159 |
| 1989 | 6.615 | 56.012 | 32.480 | 1.998 | 2.895 |
| 1990 | 10.242 | 56.625 | 27.643 | 2.259 | 3.232 |
| 1991 | 2.215 | 54.225 | 38.851 | 2.405 | 2.305 |
| 1992 | 1.749 | 47.093 | 36.502 | 9.154 | 5.503 |
| 1993 | 5.498 | 49.046 | 27.216 | 11.886 | 6.354 |
| 1994 | 8.644 | 51.093 | 23.374 | 12.447 | 4.442 |
| 1995 | 0.510 | 59.786 | 36.358 | 1.622 | 1.724 |
| 1996 | 1.285 | 51.102 | 42.041 | 2.968 | 2.603 |
| 1997 | 1.707 | 58.386 | 34.972 | 1.878 | 3.056 |
| 1998 | 8.930 | 55.188 | 31.411 | 2.024 | 2.446 |
| 1999 | 12.413 | 55.778 | 28.694 | 1.505 | 1.610 |
| 2000 | 16.137 | 50.885 | 28.626 | 1.942 | 2.410 |
| 2001 | 28.175 | 42.197 | 25.082 | 1.903 | 2.644 |
| 2002 | 18.506 | 44.734 | 32.514 | 2.022 | 2.224 |
| 2003 | 15.972 | 46.149 | 29.714 | 4.051 | 4.115 |
| 2004 | 10.398 | 40.443 | 42.173 | 3.232 | 3.754 |
| 2005 | 3.715 | 61.559 | 30.894 | 1.737 | 2.095 |
| 2006 | 9.927 | 52.407 | 31.375 | 3.181 | 3.110 |
| 2007 | 14.252 | 52.364 | 29.399 | 2.059 | 1.927 |
| 2008 | 32.555 | 42.090 | 21.503 | 1.646 | 2.205 |
| 2009 | 2.990 | 59.888 | 33.106 | 1.932 | 2.083 |
| 2010 | 36.126 | 40.765 | 21.111 | 1.249 | 0.749 |
| 2011 | 12.808 | 50.015 | 25.799 | 6.117 | 5.261 |
| 2012 | 15.245 | 47.244 | 32.558 | 2.310 | 2.644 |
| 2013 | 26.216 | 46.085 | 23.969 | 1.737 | 1.993 |
| 2014 | 16.498 | 54.600 | 24.999 | 1.764 | 2.139 |
| 2015 | 11.230 | 58.378 | 26.943 | 1.656 | 1.793 |
| 2016 | 36.351 | 32.958 | 27.160 | 1.607 | 1.924 |
| 2017 | 16.857 | 58.664 | 22.569 | 1.098 | 0.812 |
| 2018 | 27.277 | 41.387 | 27.504 | 2.071 | 1.761 |
| 2019 | 0.761 | 56.861 | 33.653 | 5.137 | 3.588 |
| 2020 | 0.734 | 59.215 | 28.984 | 6.703 | 4.364 |
| 2021 | 38.436 | 33.882 | 23.872 | 1.788 | 2.022 |
| 2022 | 13.071 | 59.798 | 24.572 | 1.166 | 1.393 |
| 2023 | 28.343 | 40.773 | 26.406 | 1.964 | 2.515 |
| 2024 | 5.488 | 59.508 | 29.509 | 2.464 | 3.032 |
